# Supplementary material
Source: Royal Society of Chemistry journal article supplement (doi:10.1039/d6cy00171h)
Supplement: d6cy00171h1.pdf [file d6cy00171h1.pdf]

## **Supplementary information**

### **In-situ fabrication of N-doped iron-based Fenton-like catalyst ( $\alpha$ -Fe<sub>2</sub>O<sub>3</sub>/N-C<sub>HCP</sub>) with superior activity toward methylene blue degradation**

*Shixuan Li<sup>a,1</sup>, Dongha Huang<sup>a,1</sup>, Jiao He<sup>a,b</sup>, Vasanthakumar Vasudevan<sup>a\*</sup>, Boqing Chen<sup>a</sup>,  
Wenjie Zhang<sup>a</sup>, Tingting Wu<sup>a</sup>, Xiao Wu<sup>a</sup>, Xiaoyan Xiang<sup>c</sup>, Jinqing Lin<sup>a\*</sup>*

*<sup>a</sup>College of Materials Science and Engineering, Huaqiao University, Xiamen 361021, China.*

*<sup>b</sup>College of Chemistry and Environmental Engineering, Sichuan University of Science and  
Engineering, Zigong, 643000, China.*

*<sup>c</sup>College of Chemistry and Materials, Longyan University, Longyan 364000, China*

*<sup>1</sup>These authors contributed equally to this work and share first authorship.*

*\*These authors contributed equally as co-corresponding authors.*

*\*Corresponding author: Jinqing Lin, Ph.D., E-mail: [linlab@hqu.edu.cn](mailto:linlab@hqu.edu.cn)  
(<https://orcid.org/0000-0003-0791-3497>); Vasanthakumar Vasudevan, Ph.D., E-mail:  
[vasanthamvs@hqu.edu.cn](mailto:vasanthamvs@hqu.edu.cn) (<https://orcid.org/0000-0002-7274-7408>)*

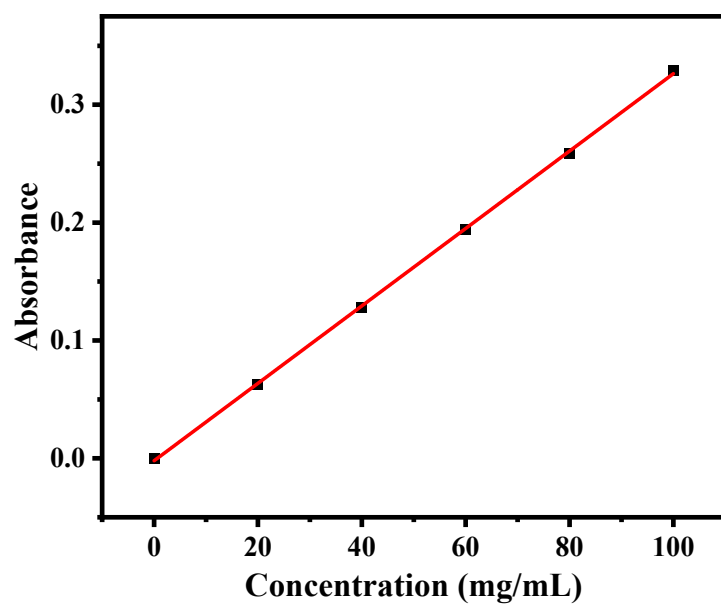

**Figure S1.** Calibration curve of methylene blue (MB) at 664 nm over a concentration range of 0-100 mg L<sup>-1</sup>.

**Table S1.** Performance comparison of various Fenton-type catalysts for MB degradation.

| Catalyst                                                        | Reaction Condition                                                                                                                           | TOC removal (%) | Stability | Reaction time (min) | Removal rate (%) | Ref.      |
|-----------------------------------------------------------------|----------------------------------------------------------------------------------------------------------------------------------------------|-----------------|-----------|---------------------|------------------|-----------|
| $\alpha$ -Fe <sub>2</sub> O <sub>3</sub> /N-C <sub>HCP</sub> -2 | [MB] <sub>0</sub> = 100 mg L <sup>-1</sup> ,<br>[catalyst] = 0.40 g L <sup>-1</sup> ,<br>[H <sub>2</sub> O <sub>2</sub> ] = 50 mM, pH = 7.3. | 51.2            | 4 runs    | 15                  | 100              | This work |
| mFe-MPB                                                         | [MB] <sub>0</sub> = 20 mg L <sup>-1</sup> ,<br>[catalyst] = 0.1 g L <sup>-1</sup> ,<br>[H <sub>2</sub> O <sub>2</sub> ] = 12 mM, pH = 7.     | -               | 5 runs    | 30                  | 100              | 1         |
| Fe/C-700                                                        | [MB] <sub>0</sub> = 10 mg L <sup>-1</sup> ,<br>[catalyst] = 1.00 g L <sup>-1</sup> ,<br>[H <sub>2</sub> O <sub>2</sub> ] = 7 mM, pH = 7.     | 58              | 5 runs    | 120                 | 100              | 2         |
| Fe <sub>3</sub> O <sub>4</sub> @NC-20                           | [MB] <sub>0</sub> = 50 mg L <sup>-1</sup> ,<br>[catalyst] = 0.75g L <sup>-1</sup> ,<br>[H <sub>2</sub> O <sub>2</sub> ] = 239 mM, pH = 7.3.  | 59              | --        | 50                  | 100              | 3         |
| Fe <sub>3</sub> O <sub>4</sub> /usGO                            | [MB] <sub>0</sub> = 5 mg L <sup>-1</sup> ,<br>[catalyst] = 2.92 g L <sup>-1</sup> ,<br>[H <sub>2</sub> O <sub>2</sub> ] = 10 mM, pH = 3.     | --              | 5 runs    | 120                 | 100              | 4         |
| Solid iron wastes (SIW)                                         | [MB] <sub>0</sub> = 10 mg L <sup>-1</sup> ,<br>[catalyst] = 1.00 g L <sup>-1</sup> , [PS] = 4 mM, pH = 7                                     | 72              | 5 runs    | 60                  | 100              | 5         |
| NC-CuFe-2                                                       | [MB] <sub>0</sub> = 100 mg L <sup>-1</sup> ,<br>[catalyst] = 0.50g L <sup>-1</sup> ,<br>[H <sub>2</sub> O <sub>2</sub> ] = 0.3 M, pH = 7.    |                 | 5 runs    | 180                 | 98               | 6         |
| C-Fe <sub>2</sub> O <sub>3</sub> -2                             | [MB] <sub>0</sub> = 50 mg L <sup>-1</sup> ,<br>[catalyst] = 100 mg, [H <sub>2</sub> O <sub>2</sub> ] = 0.3 M, pH = 7.3.                      | -               | 5 runs    | 420                 | 96               | 7         |
| MnO <sub>2</sub> /Fe <sub>3</sub> O <sub>4</sub> /diatomite     | [MB] <sub>0</sub> = 10 mg L <sup>-1</sup> ,<br>[catalyst] = 0.10g L <sup>-1</sup> ,<br>[PMS] = 0.30 g/L, pH = 6.                             | 57.2            | 5 runs    | 45                  | 100              | 8         |

|                                                     |                                                                                                                                             |      |         |    |     |    |
|-----------------------------------------------------|---------------------------------------------------------------------------------------------------------------------------------------------|------|---------|----|-----|----|
| SUST/Fe-BTC                                         | [MB] <sub>0</sub> = 1.6 mmol/L,<br>[catalyst] = 0.6 g L <sup>-1</sup> ,<br>[H <sub>2</sub> O <sub>2</sub> ] = 7.4 mM, pH = 4.               | 55   | 3       | 60 | 100 | 9  |
| Fe, N-CDs                                           | [MB] <sub>0</sub> = 20 mg L <sup>-1</sup> ,<br>[catalyst] = 0.5 mg mL <sup>-1</sup> ,<br>[H <sub>2</sub> O <sub>2</sub> ] = 147 mM, pH = 8. | -    | -       | 60 | 97  | 10 |
| Fe <sub>3</sub> O <sub>4</sub> @C                   | [MB] <sub>0</sub> = 10 mg L <sup>-1</sup> ,<br>[catalyst] = 0.5g L <sup>-1</sup> , pH = 4.                                                  | 67.5 | -       | 80 | 97  | 11 |
| Fe-GMCA                                             | [MB] <sub>0</sub> = 10 mg L <sup>-1</sup> ,<br>[catalyst] = 0.02g L <sup>-1</sup> , pH = 3,<br>applied current, 15 Ma.                      | -    | 10 runs | 60 | 99  | 12 |
| Yolk-shell<br>Fe <sub>3</sub> O <sub>4</sub> @MOF-5 | [MB] <sub>0</sub> = 50 mg L <sup>-1</sup> ,<br>[catalyst] = 1.0 g L <sup>-1</sup> ,<br>[H <sub>2</sub> O <sub>2</sub> ] = 30 mM, pH = 4.    | 60   | 5 runs  | 60 | 100 | 13 |
| NH <sub>2</sub> -MIL-<br>88B(Fe)                    | [MB] <sub>0</sub> = 20 mg L <sup>-1</sup> ,<br>[catalyst] = 0.2 g L <sup>-1</sup> ,<br>[H <sub>2</sub> O <sub>2</sub> ] = 200 mM, pH = 5.6. | 54.6 | 5 runs  | 45 | 100 | 14 |

---

## References:

- 1 B. Huang, C. Yang, H. Zeng and L. Zhou, *Int. J. Biol. Macromol.*, 2023, 253, 126753.
- 2 Y. Zheng, Y. Wei, J. Fan, X. Liu, Z. Zhu and B. Yang, *ChemistrySelect*, 2022, 7, e202203263.
- 3 J. Ou, K. Luo, H. Tan, N. Li, B. Hu and G. Yu, *New Journal of Chemistry*, 2022, 46, 15882-15890.
- 4 S. Song, Y. Wang, H. Shen, J. Zhang, H. Mo, J. Xie, N. Zhou and J. Shen, *ACS Appl. Nano Mater.*, 2019, 2, 7074-7084.
- 5 K. Mensah, M. Samy, H. Ezz, M. Elkady and H. Shokry, *J. Environ. Manage.*, 2022, 314, 115108.
- 6 B. Ren, J. Miao, Y. Xu, Z. Zhai, X. Dong, S. Wang, L. Zhang and Z. Liu, *J. Clean. Prod.*, 2019, 240, 118143.
- 7 B. Ren, Y. Xu, C. Zhang, L. Zhang, J. Zhao and Z. Liu, *J. Taiwan Inst. Chem. Eng.*, 2019, 97, 170-177.
- 8 Z. Li, X. Tang, K. Liu, J. Huang, Y. Xu, Q. Peng and M. Ao, *Beilstein Journal of Nanotechnology*, 2018, 9, 1940–1950.
- 9 F. Martínez, P. Leo, G. Orcajo, M. Díaz-García, M. Sanchez-Sanchez and G. Calleja, *Catal. Today*, 2018, 313, 6–11.
- 10 S. A. Beker, L. S. Khudur, I. Cole and A. S. Ball, *New Journal of Chemistry*, 2022, 46, 263–275.
- 11 Z. Xu, Z. Wang, D. Wang, H. Gao, Y. Ding, J. Cheng and Y. Han, *Appl. Surf. Sci.*, 2025, 683, 161764.
- 12 W. Chen, X. Yang, J. Huang, Y. Zhu, Y. Zhou, Y. Yao and C. Li, *Electrochim. Acta*, 2016, 200, 75–83.
- 13 R. Yang, Q. Peng, B. Yu, Y. Shen and H. Cong, *Sep. Purif. Technol.*, 2021, 267, 118620.
- 14 J. He, Y. Zhang, X. Zhang and Y. Huang, *Sci. Rep.*, 2018, 8, 5159.
